# Supplementary material
Source: publisher site journal article supplement (https://www.dovepress.com/get_supplementary_file.php?f=468093.docx)
Supplement: Supplementary file 1 [file get_supplementary_file.php]

**Supplementary Table 1** Establishment of the logistic regression prediction model CWTS combined with Chinese Visceral Adiposity Index, waist-to-height ratio, triglyceride, and systolic blood pressure

| Variable | β | SE | Wald χ2 | *P* value | OR (95%CI) |
| --- | --- | --- | --- | --- | --- |
| cVAI | 0.024 | 0.007 | 13.010 | < 0.001 | 1.024 (1.011 - 1.038) |
| WHtR | 13.735 | 4.937 | 7.739 | 0.005 | 922443.717 (57.873 - 1.470E+10) |
| TG | 1.122 | 0.200 | 31.318 | < 0.001 | 3.070 (2.072 - 4.546) |
| SBP | 0.019 | 0.009 | 4.550 | 0.033 | 1.019 (1.002 - 1.037) |
| Constant | -14.307 | 2.649 | 29.173 |  |  |
